# Supplementary material for: Isolation and Characterization of New Anti-Inflammatory and Antioxidant Components from Deep Marine-Derived Fungus Myrothecium sp. Bzo-l062
Source: PubMed Central journal article supplement (PMC7760613; doi:10.3390/md18120597), 2020-11-26
Supplement: marinedrugs-18-00597-s001.pdf [file marinedrugs-18-00597-s001.pdf]

# Isolation and Characterization of New Anti-Inflammatory and Antioxidant Components from Deep Marine-Derived Fungus *Myrothecium* SP. Bzo-1062

Xiaojie Lu <sup>1,2,†</sup>, Junjie He <sup>1,†</sup>, Yanhua Wu <sup>3</sup>, Na Du <sup>1</sup>, Xiaofan Li <sup>1</sup>, Jianhua Ju <sup>4</sup>, Zhangli Hu <sup>1,2</sup>, Kazuo Umezawa <sup>3,\*</sup> and Liyan Wang <sup>1,\*</sup>

<sup>1</sup> Shenzhen Key Laboratory of Marine Bioresource and Eco-environmental Science, College of Life Sciences and Oceanography, Shenzhen University, Shenzhen 518060, China; luxiaojie@szu.edu.cn (X.L.); hejunjie2017@email.szu.edu.cn (J.H.); duna2017@email.szu.edu.cn (N.D.); lixiaof@szu.edu.cn (X.L.); huzl@szu.edu.cn (Z.H.)

<sup>2</sup> Key Laboratory of Optoelectronic Devices and Systems of Ministry of Education and Guangdong Province, College of Optoelectronic Engineering, Shenzhen University, Shenzhen 518060, China

<sup>3</sup> Department of Molecular Target Medicine, Aichi Medical University School of Medicine, Nagakute 480-1195, Japan; wu.yanhua.196@mail.aichi-med-u.ac.jp

<sup>4</sup> CAS Key Laboratory of Tropical Marine Bio-resources and Ecology, South China Sea Institute of Oceanology, Chinese Academy of Sciences, Guangzhou, Guangdong 510301, China; jju@scsio.ac.cn

\* Correspondence: lwang@szu.edu.cn (L.W.); umezawa@aichi-med-u.ac.jp (K.U.); Tel.: +86-755-2601-2653 (L.W.); +81-561-61-1959 (K.U.)

† These authors contributed equally to this work.

Spectrum from Data20191102-hj-3a.wiff (sample 1) - Sample021, +TOF MS (100 - 1500) from 0.107 to 0.143 min, subtracted by (Spectrum from Data20191102-hj-3a.wiff (sample 1) - Sample021, +TOF MS (100 - 1500) from 0.043 to 0.071 min)

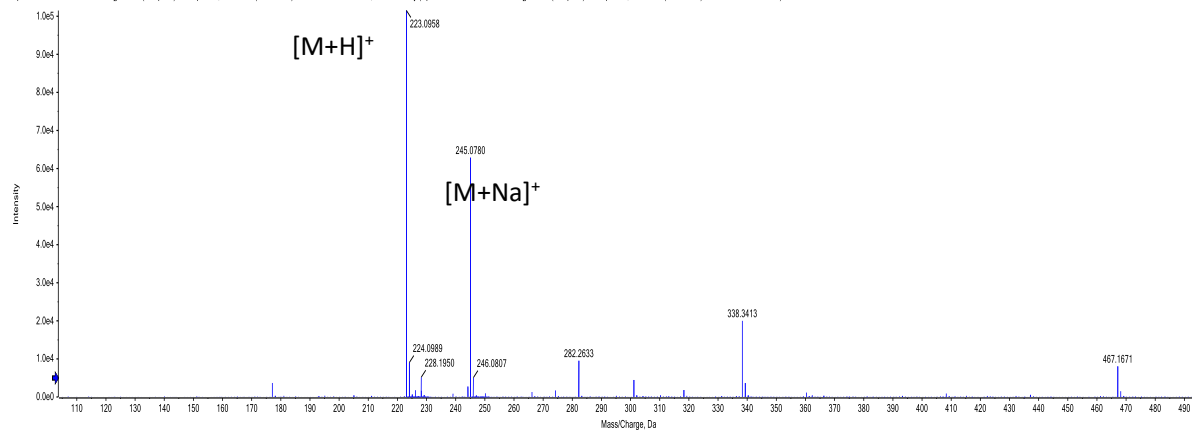

Figure S1. HR-ESI MS spectrum of compound 1

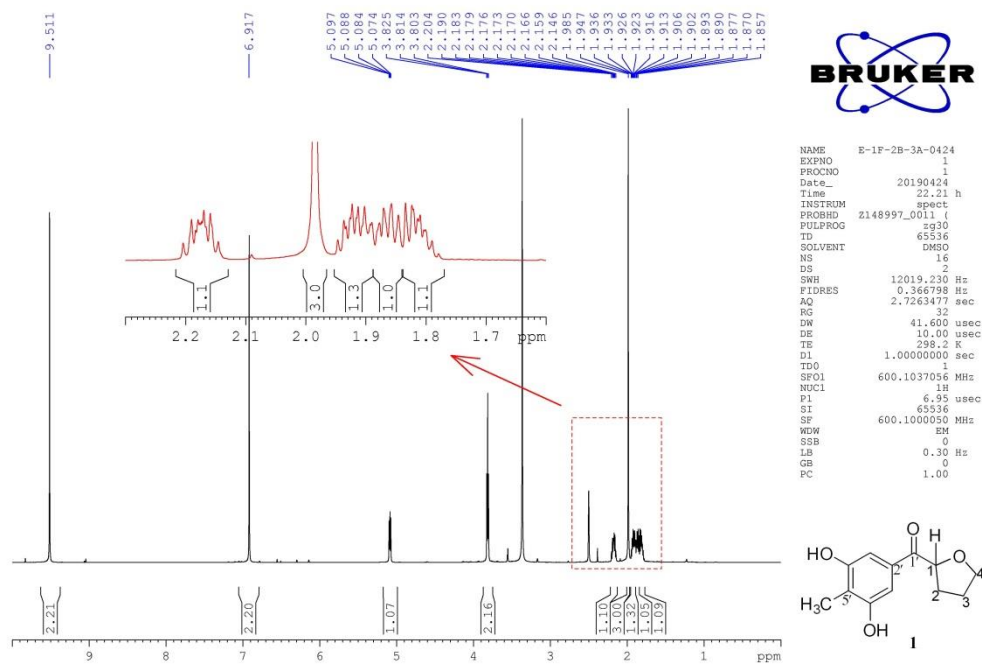

Figure S2. <sup>1</sup>H NMR spectrum of compound 1 in DMSO-*d*<sub>6</sub>

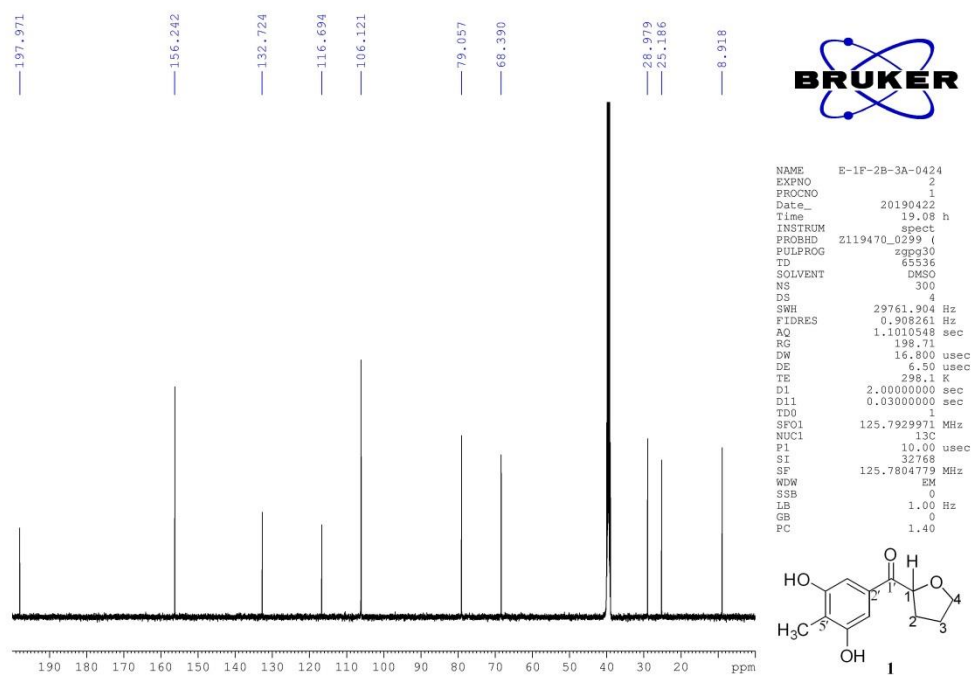

Figure S3.  $^{13}\text{C}$  NMR spectrum of compound 1 in  $\text{DMSO-}d_6$

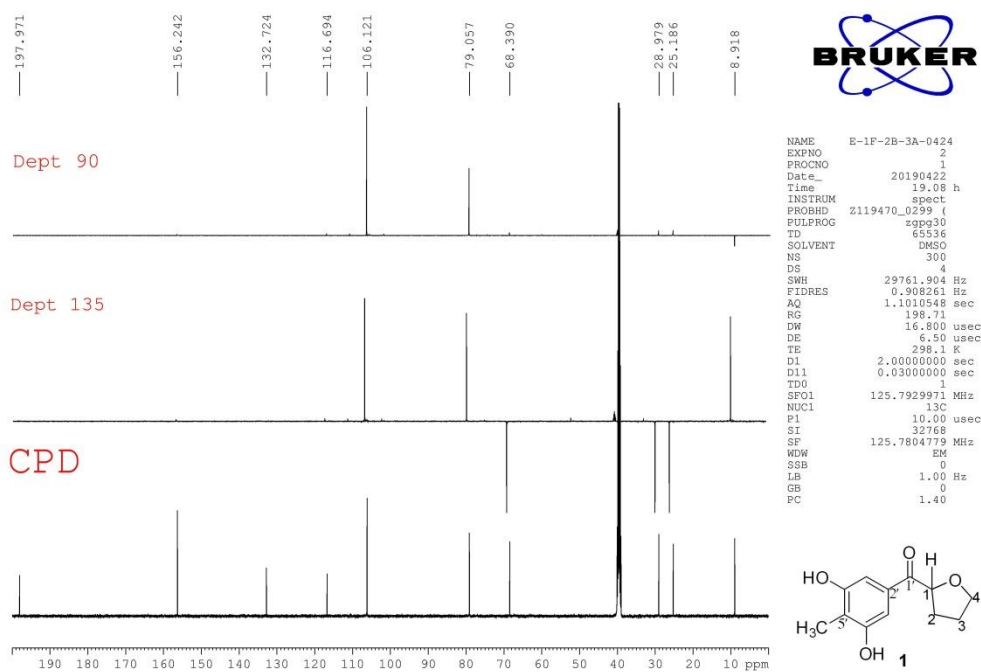

Figure S4. DEPT spectrum of compound 1 in  $\text{DMSO-}d_6$

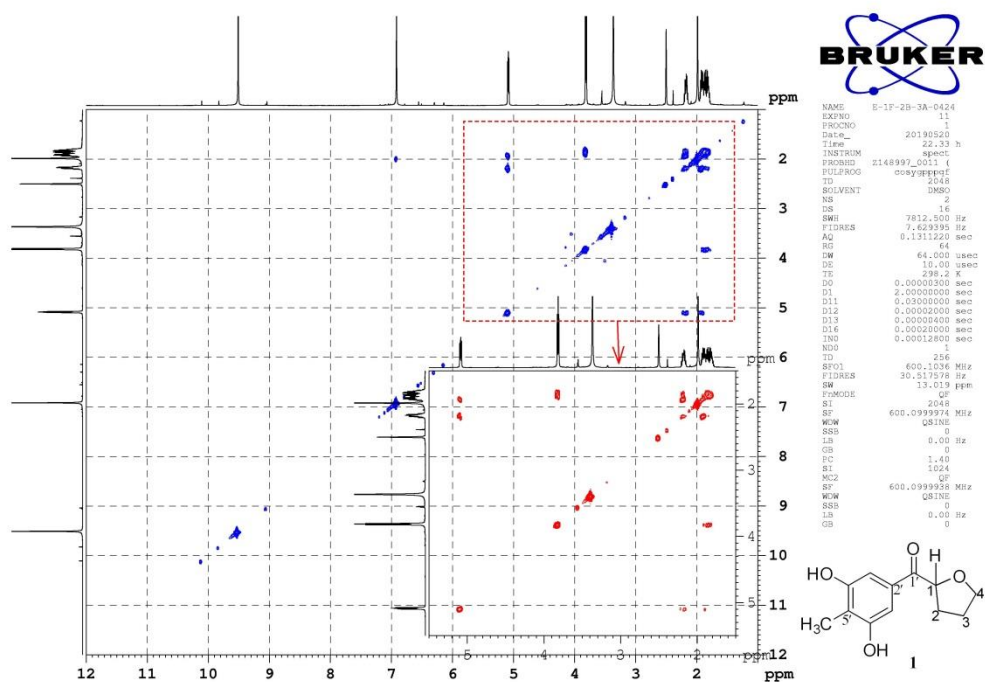

Figure S5  $^1\text{H}$ - $^1\text{H}$  COSY spectrum of compound 1 in  $\text{DMSO-}d_6$

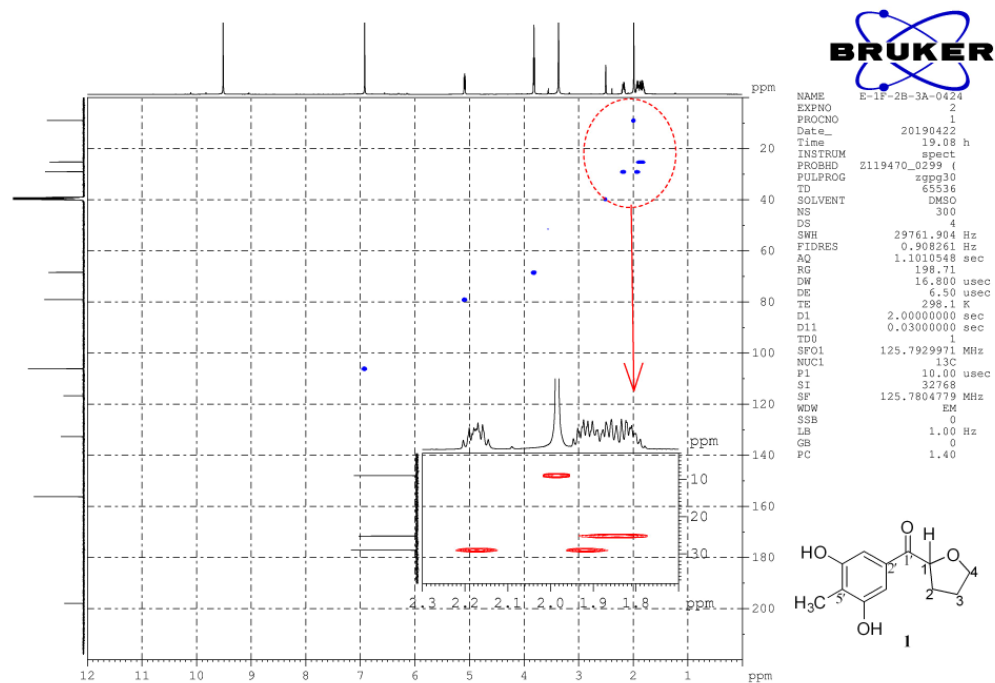

Figure S6. HSQC spectrum of compound 1 in  $\text{DMSO-}d_6$

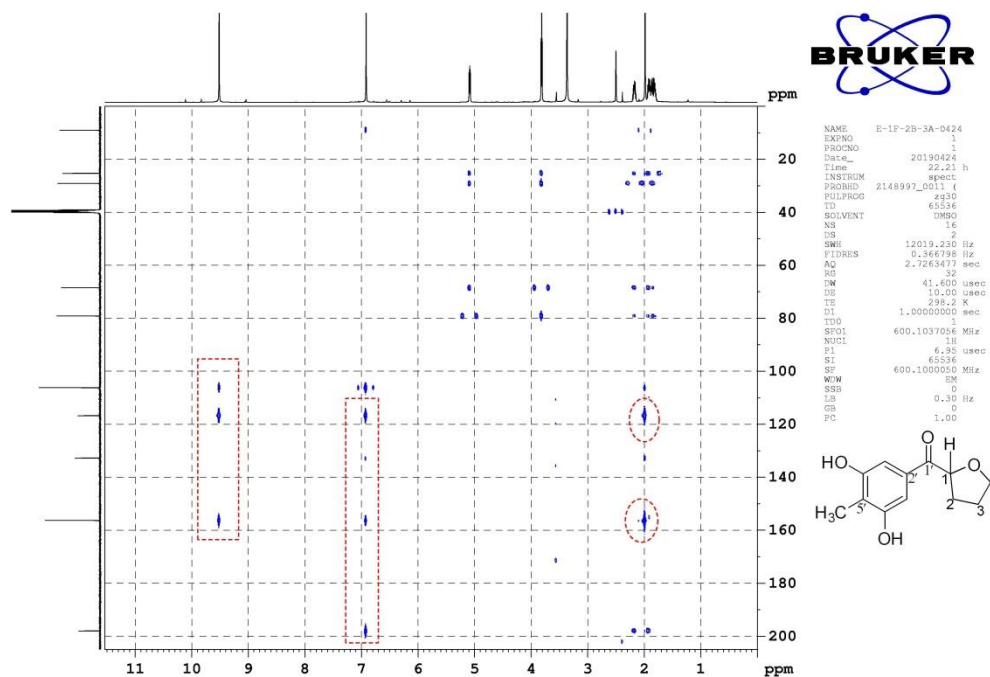

Figure S7 HMBC spectrum of compound 1 in DMSO-*d*<sub>6</sub>

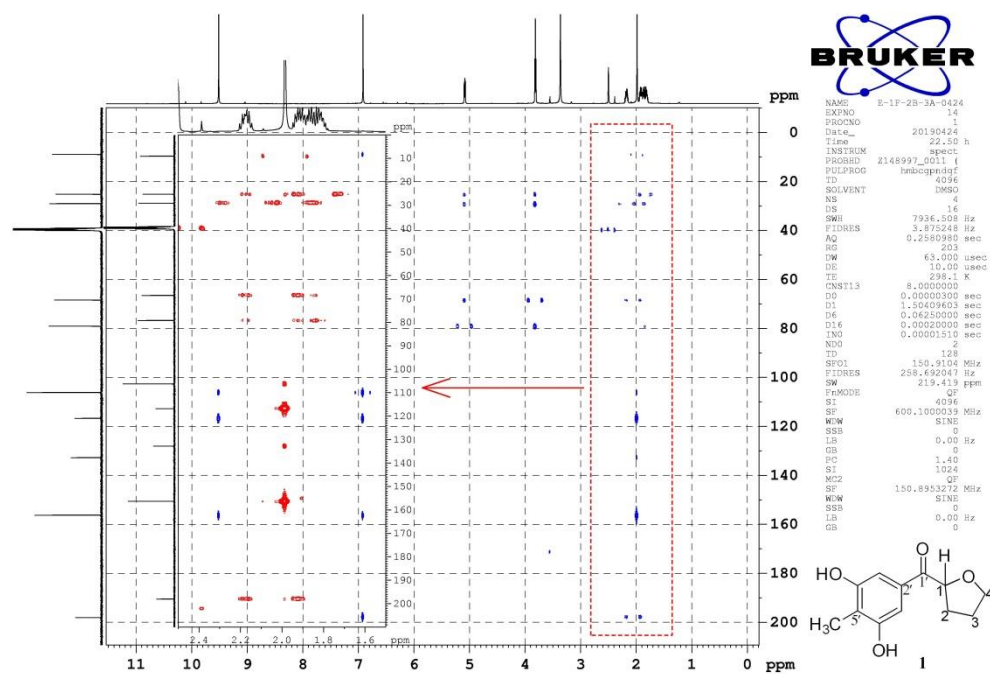

Figure S8 Partial HMBC spectrum of compound 1 in DMSO-*d*<sub>6</sub>

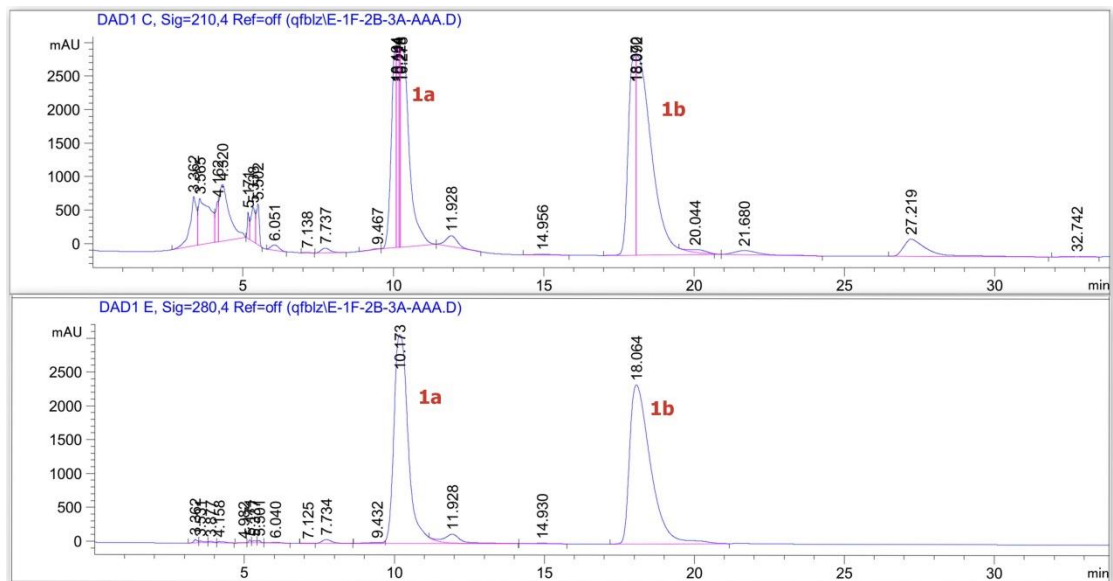

Figure S9 Chiral separation of racemic **1**

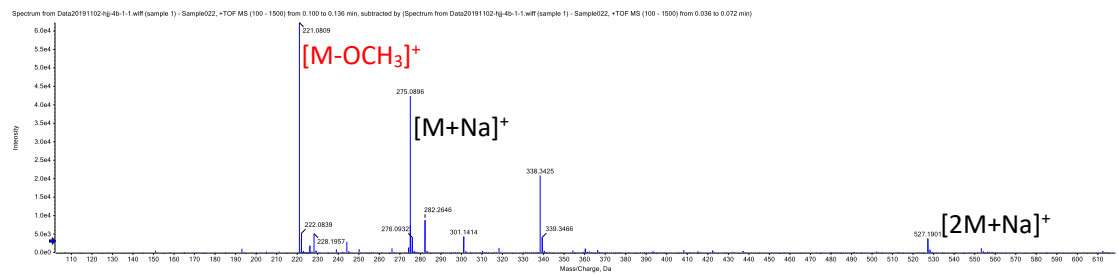

Figure S10. HR-ESI MS spectrum of compound **2**

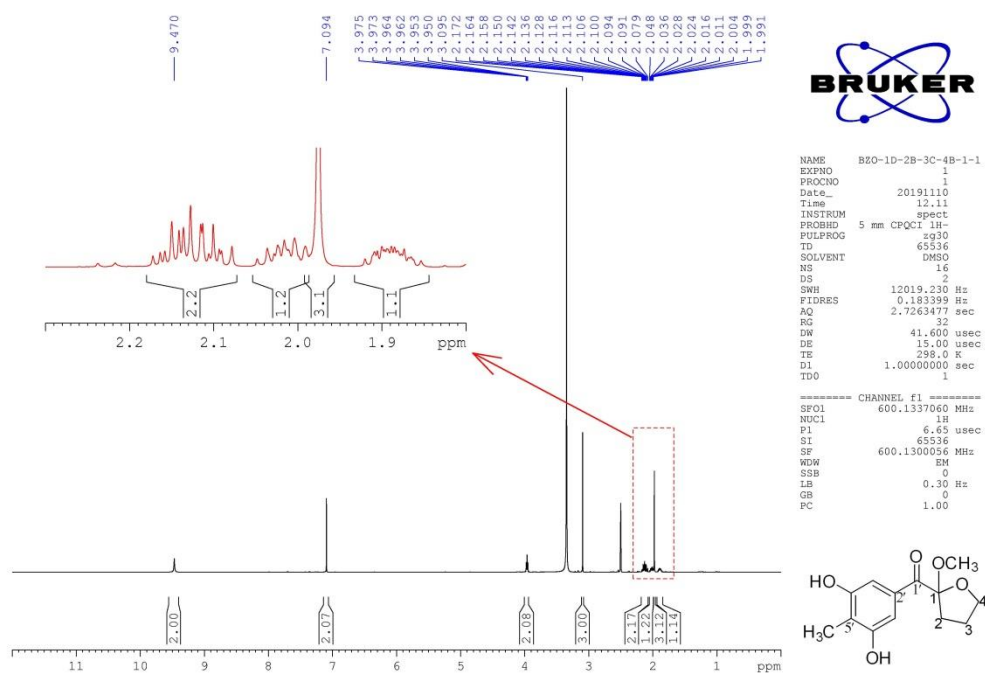

Figure S11.  $^1\text{H}$  NMR spectrum of compound **2** in  $\text{DMSO-}d_6$

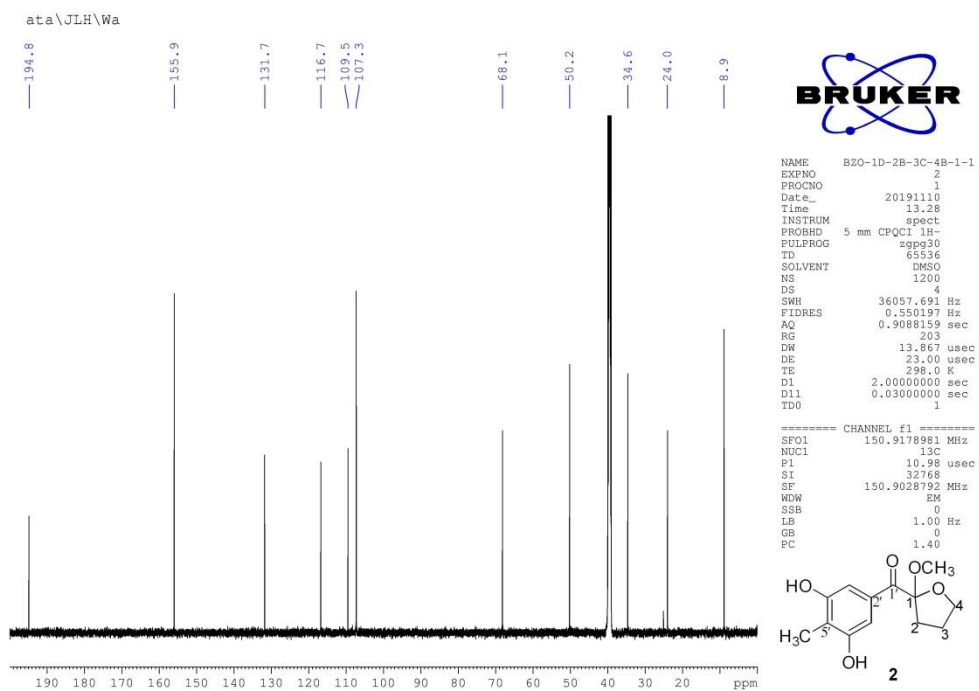

Figure S12.  $^{13}\text{C}$  NMR spectrum of compound **2** in  $\text{DMSO-}d_6$

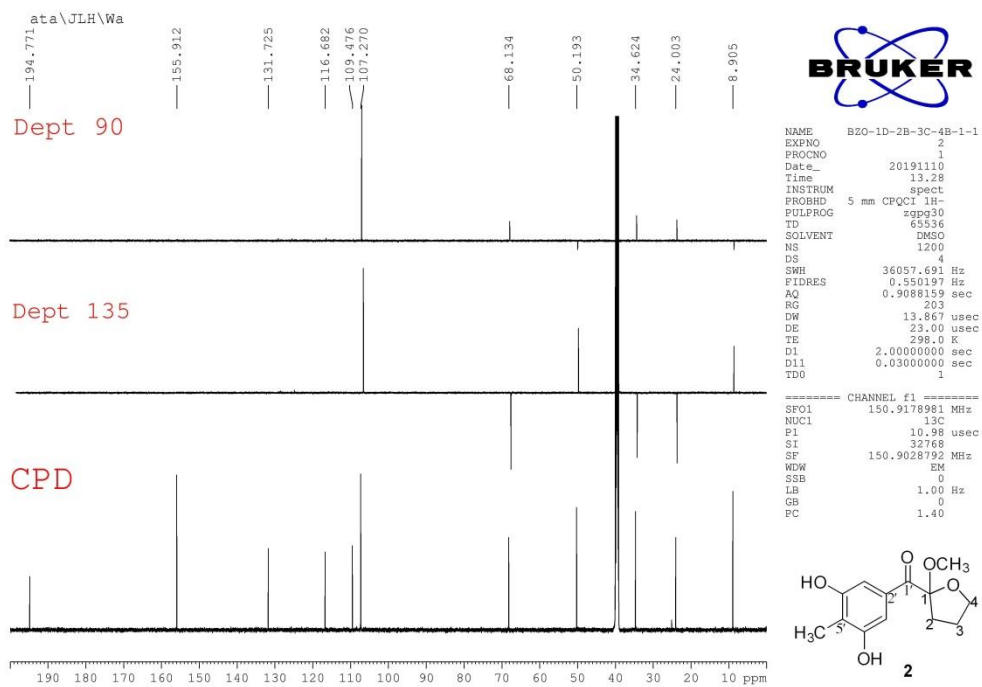

Figure S13. DEPT spectrum of compound 2 in DMSO- $d_6$

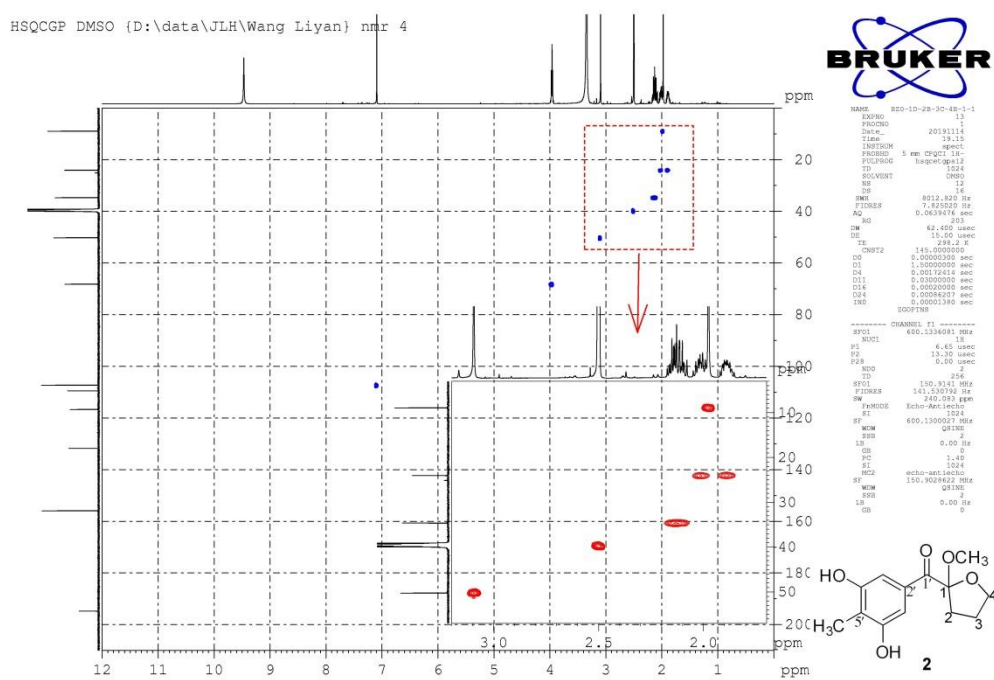

Figure S14. HSQC spectrum of compound 2 in DMSO- $d_6$



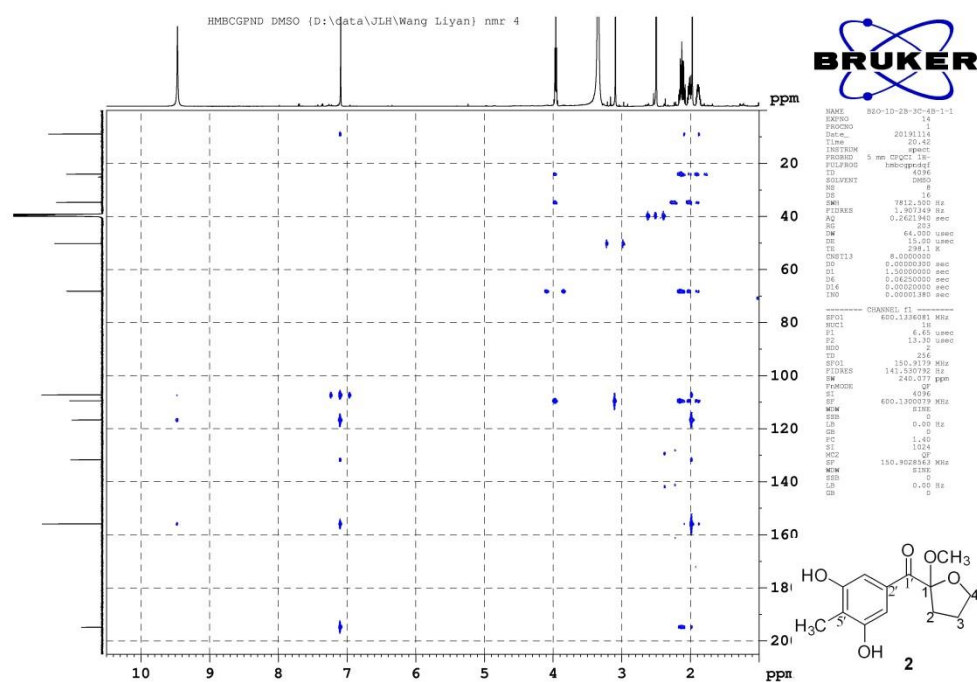

Figure S15. The HMBC spectrum of compound 2 in DMSO- $d_6$

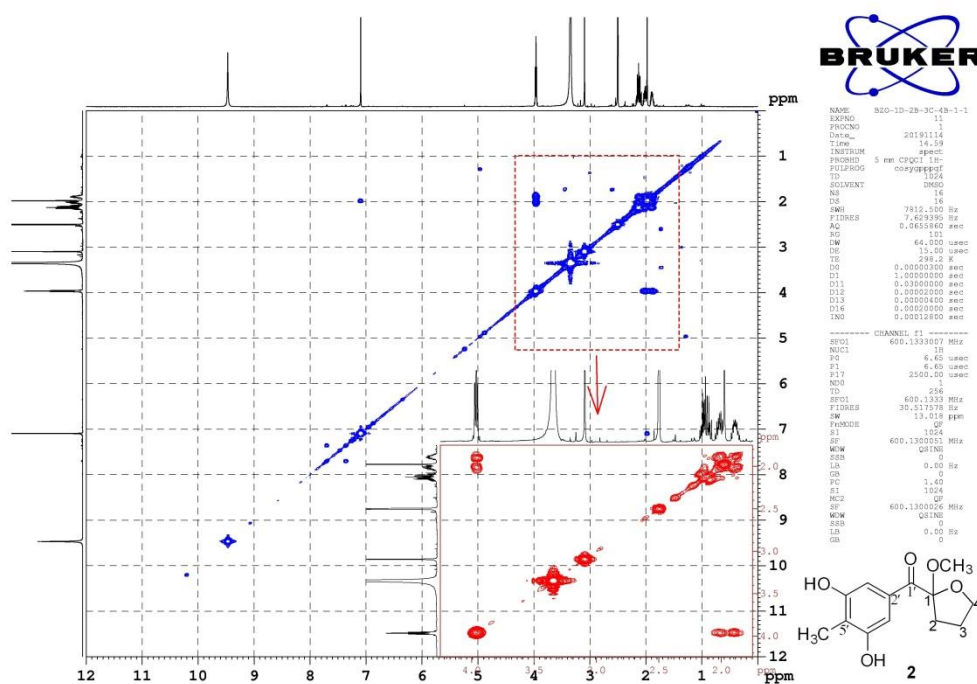

Figure S16. The  $^1\text{H}$ - $^1\text{H}$  COSY spectrum of compound 2 in DMSO- $d_6$

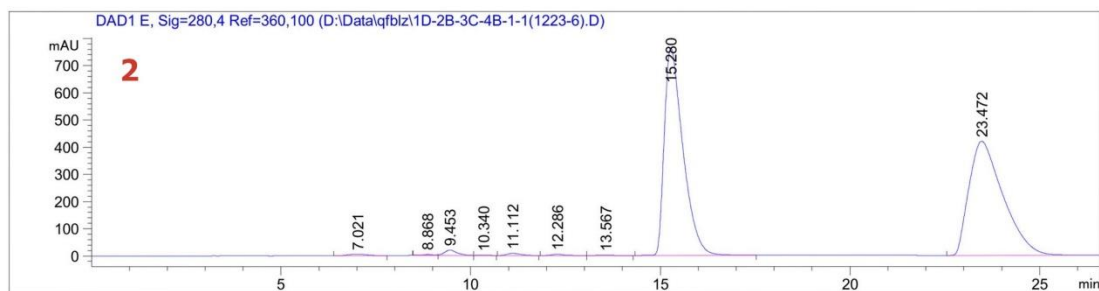

Figure S17. Chiral separation of racemic **2**

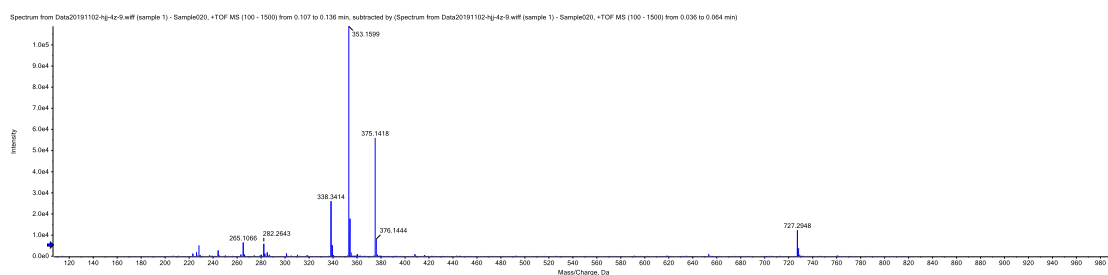

Figure S18. HR-ESI MS spectrum of compound **3**

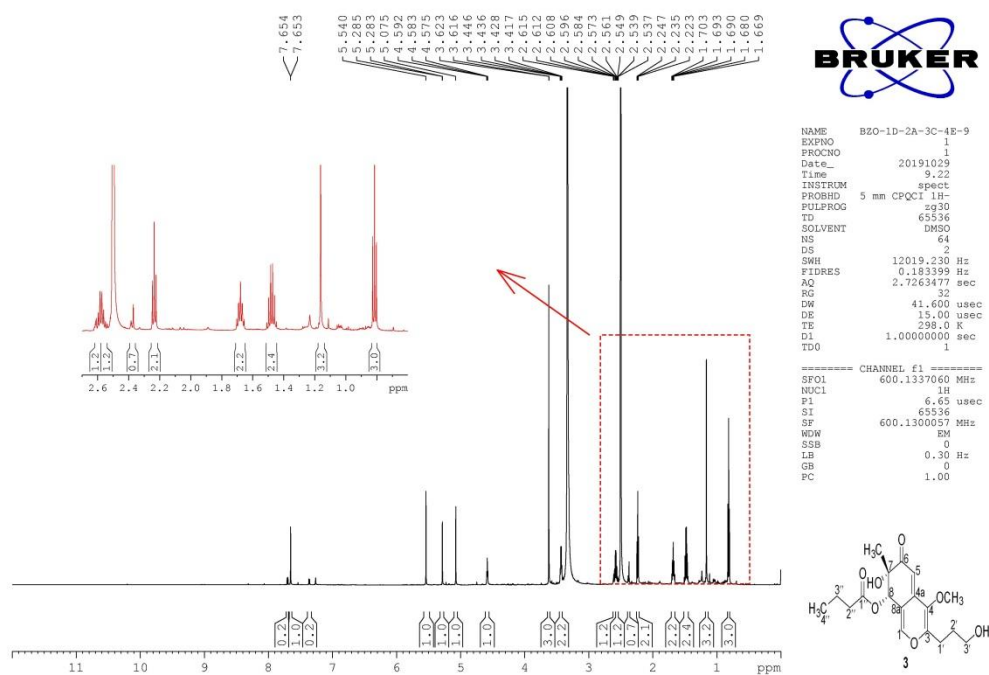

Figure S19. <sup>1</sup>H NMR spectrum of compound **3** in DMSO-*d*<sub>6</sub>

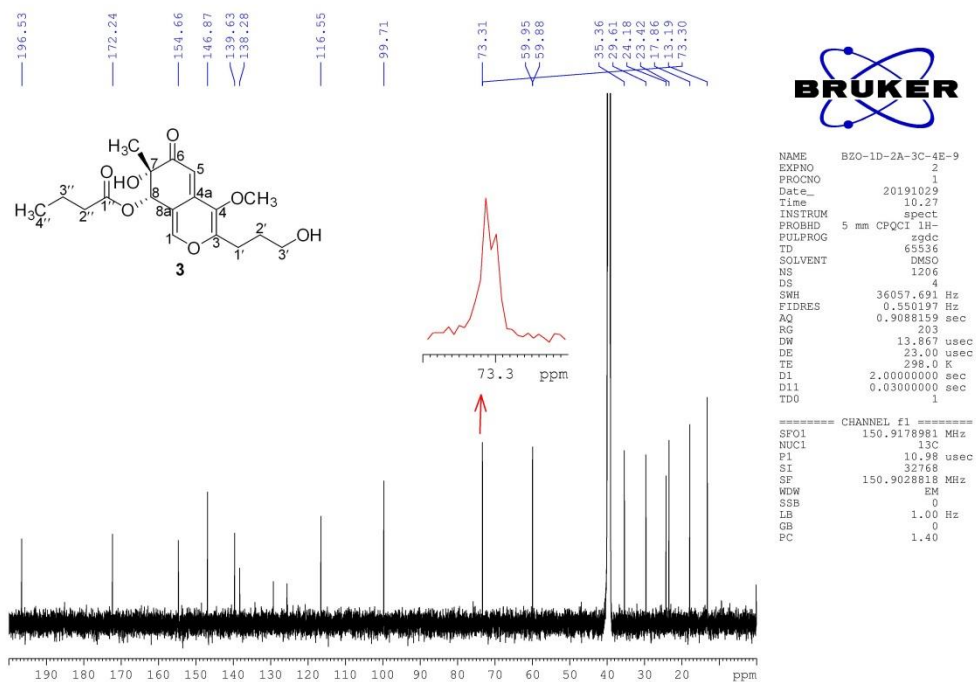

Figure S20.  $^{13}\text{C}$  NMR spectrum of compound 3 in  $\text{DMSO-}d_6$

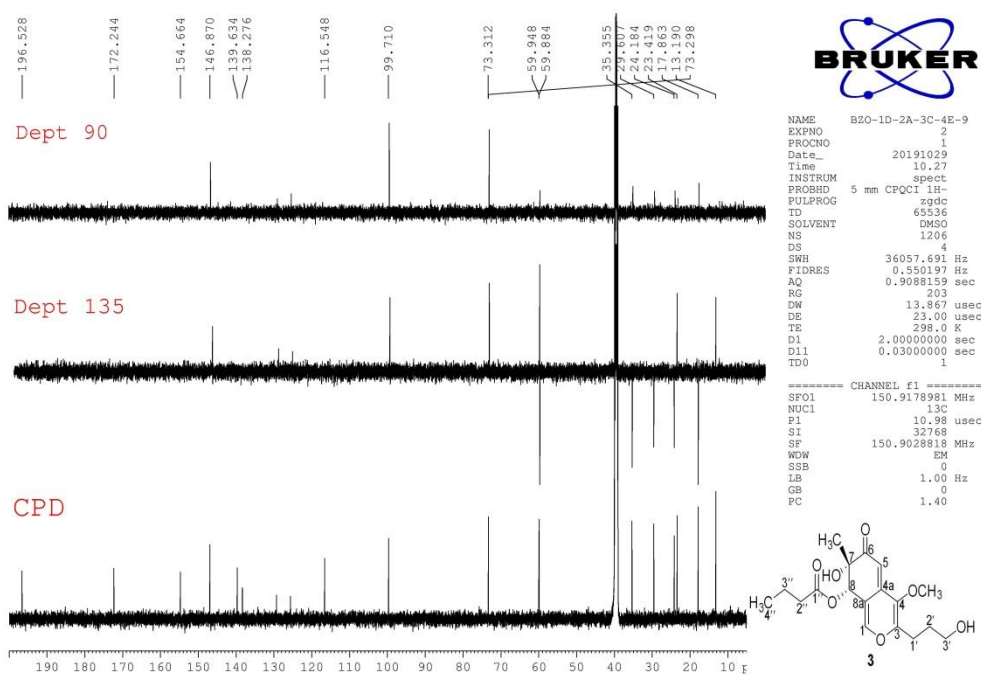

Figure S21. DEPT spectrum of compound 3 in  $\text{DMSO-}d_6$



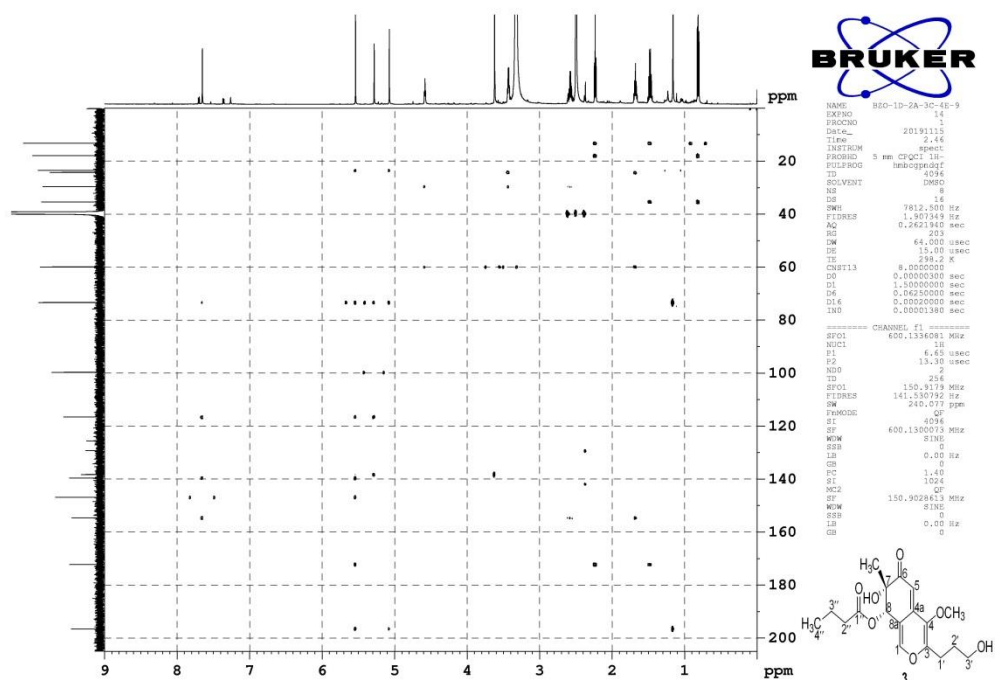

Figure S24. The HMBC spectrum of compound 3 in DMSO- $d_6$

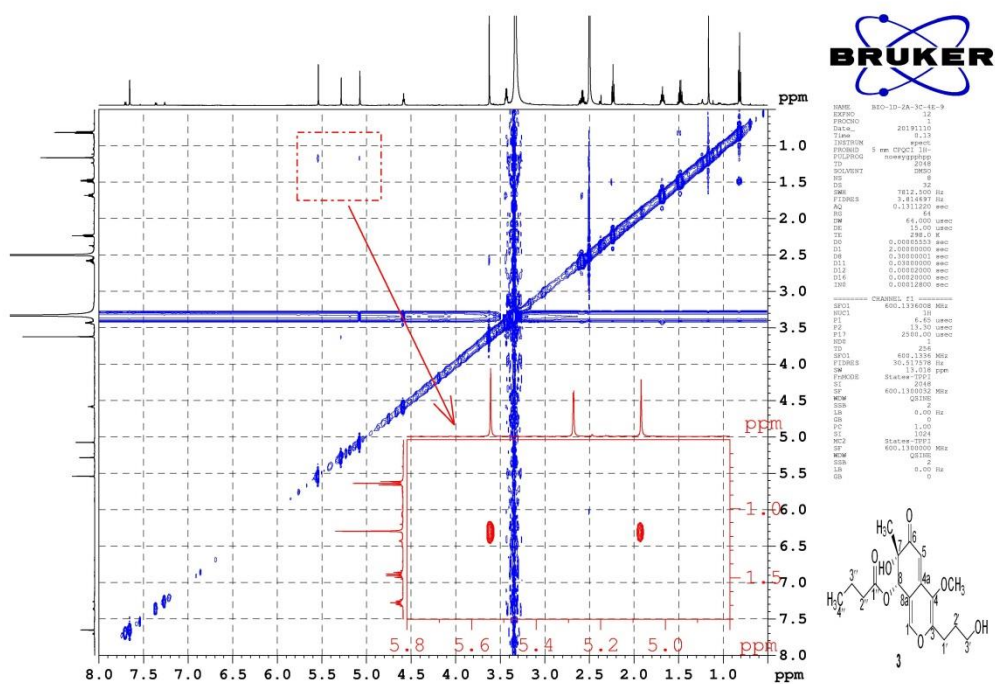

Figure S25. The NOESY spectrum of compound 3 in DMSO- $d_6$
